# Supplementary material for: Adaptation to the cervical environment is associated with increased antibiotic susceptibility in Neisseria gonorrhoeae
Source: PubMed Central journal article supplement (PMC7431566; doi:10.1038/s41467-020-17980-1), 2020-08-17
Supplement: 41467_2020_17980_MOESM3_ESM.pdf [file 41467_2020_17980_MOESM3_ESM.pdf]

## **Descriptions of Additional Supplementary Files**

### **Supplementary Data 1.**

**Description:** Multiple regression results for log-transformed antibiotic MICs comparing models with and without MtrC LOF.

### **Supplementary Data 2.**

**Description:** Annotated significant unitigs from *N. gonorrhoeae* GWAS conducted on logtransformed antibiotic MICs.

### **Supplementary Data 3.**

**Description:** SRA accession numbers, genotypes, antimicrobial phenotypes, and patient metadata for all isolates in the *N. gonorrhoeae* global collection.

### **Supplementary Data 4.**

**Description:** SRA accession numbers, genotypes, antimicrobial phenotypes, and patient metadata for all isolates in the *N. gonorrhoeae* Australia validation collection.

### **Supplementary Data 5.**

**Description:** PubMLST accession numbers, urogenital clade membership, and MtrC LOF status for all isolates in the ST-11 *N. meningitidis* collection.
